# Supplementary material for: Long-term MAX-DOAS network observations of NO 2 in Russia and Asia (MADRAS) during the period 2007–2012: instrumentation, elucidation of climatology, and comparisons with OMI satellite observations and global model simulations
Source: Copernicus journal article supplement (doi:10.5194/acp-14-7909-2014), 2014-08-11
Supplement: Supplementary file 1 [file acp-14-7909-2014-supplement.pdf]

Supplement of Atmos. Chem. Phys., 14, 7909–7927, 2014  
<http://www.atmos-chem-phys.net/14/7909/2014/>  
doi:10.5194/acp-14-7909-2014-supplement  
© Author(s) 2014. CC Attribution 3.0 License.

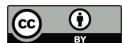

Atmospheric  
Chemistry  
and Physics  
Open Access

The logo for the journal, featuring the letters 'EG' inside a stylized globe or circular frame.

*Supplement of*

**Long-term MAX-DOAS network observations of NO<sub>2</sub> in Russia and Asia (MADRAS) during the period 2007–2012: instrumentation, elucidation of climatology, and comparisons with OMI satellite observations and global model simulations**

**Y. Kanaya et al.**

*Correspondence to:* Y. Kanaya (yugo@jamstec.go.jp)

## 7 **Overview and Features of AOD**

8 The methodology used to derive AOD values at 476 nm is described in the main text, and the  
9 results are briefly summarized in this supplementary material. A color index (defined as the  
10 ratio of the intensities at 500 and 380 nm) was used to screen out cloudy cases. The threshold  
11 values used for the color index are listed in Table S1. The threshold value for Cape Hedo was  
12 changed from 1.50 (Takashima et al., 2009) to 2.40 (this study) with equivalence, because the  
13 offsets at the two wavelengths were newly taken into account for the revised calculation of the  
14 color index. For other locations, we tentatively determined the equivalent color index  
15 threshold values based on the assumption that the color ratio under conditions where the sky  
16 was the most whitish was similar to that at Cape Hedo; this provided calibration information  
17 for the relative responses of the individual instruments at 380 and 500 nm.

18 Figure S1 shows the time series of monthly means of the AODs at six sites, with and  
19 without cloud screening, based on the MAX-DOAS color index. The site-to-site differences  
20 were not very large in comparison with those in the case of NO<sub>2</sub>; in particular, the AOD levels  
21 for Yokosuka ( $0.24 \pm 0.05$  ( $1\sigma$ )) as averages of monthly mean values after cloud screening, see  
22 Table S2), an urban site, were similar to those at Cape Hedo ( $0.33 \pm 0.13$  ( $1\sigma$ )), a remote  
23 island. Hefei had the highest average value ( $0.59 \pm 0.13$  ( $1\sigma$ )) among the studied locations.  
24 The levels were roughly comparable to the climatological AOD values derived from satellite  
25 sensors, i.e., Moderate Resolution Imaging Spectroradiometer (MODIS)/Terra, MODIS/Aqua,  
26 and Multi-angle Imaging Spectroradiometer (MISR)/Terra (Fig. S1 and Table S2). The used  
27 monthly average satellite data are from MODIS/Terra (Collection 5) and MODIS/Aqua  
28 (Collection 5.1) at a  $1^\circ \times 1^\circ$  grid resolution, and MISR/Terra (ver. 31) at a  $0.5^\circ \times 0.5^\circ$  grid  
29 resolution, available from the NASA Goddard Earth Sciences Data and Information Services  
30 Center (<http://daac.gsfc.nasa.gov/giovanni/>). For the MODIS sensors, the AOD values at 550  
31 nm were converted to those at 476 nm using the reported Ångström parameters. For MISR,  
32 the Ångström parameters were estimated from the reported AOD values at multiple

33 wavelengths (443, 555, 670, and 865 nm), and then the AOD values at 476 nm were estimated.  
34 Although the MODIS/Terra and MISR/Terra observations were made in the morning, and the  
35 MODIS/Aqua observations were made in the afternoon, they were all compared with the  
36 daytime averages of the MAX-DOAS observations. The AODs derived from MAX-DOAS  
37 did not show significant diurnal variations (data not shown).

38 Similar seasonal variation patterns at remote islands (Cape Hedo and Fukue) were found  
39 for the MAX-DOAS and satellite observations, with higher values in winter–spring as a result  
40 of long-range transport from the Asian continent along the westerlies. The agreement was  
41 excellent for Zvenigorod. Common increases in August 2010 were attributable to intense  
42 forest/peat fires. At Yokosuka, the average MAX-DOAS AOD level with cloud screening was  
43 more consistent with MISR than with MODIS (especially in summer), partly because of better  
44 spatial resolution. Similar tendencies were found for Gwangju and Hefei. For Hefei, the  
45 month-to-month variation patterns were qualitatively similar for MAX-DOAS and satellite  
46 data. Comparisons with satellite data with finer spatial resolutions will be studied in the  
47 future.

48 Figure S2 shows hourly-averaged AODs derived from MAX-DOAS and sky radiometer  
49 (Aoki and Fujiyoshi, 2003) data at Fukue for 2009. The AOD value at 476 nm for sky  
50 radiometer was calculated from the reported AOD value at 500 nm and the Ångström exponent.  
51 A strong positive correlation was found around the 1:1 line. Similar comparisons with sky  
52 radiometers and Mie lidar observations were successful at Tsukuba (Irie et al., 2008) and at  
53 Cape Hedo (Takashima et al., 2009). Based on these features, we conclude that our AOD  
54 products, with an estimated 30% uncertainty, are basically consistent with available  
55 observations. As mentioned in the main text, 30% uncertainty in the AOD introduced only  
56 10% or less uncertainty in the TropoNO<sub>2</sub>VCD. Therefore the aerosol information can be  
57 satisfactorily used to estimate NO<sub>2</sub> optimally and to study the general trends in the  
58 OMI(NASA)/MAX-DOAS ratio of TropoNO<sub>2</sub>VCD against the AOD.

59 **Table S1.** Recommended threshold values for color index used for cloud screening.

| Instrument    | Threshold value |
|---------------|-----------------|
| Cape Hedo #1  | 2.40            |
| Yokosuka #1   | 1.67            |
| Fukue #1      | 0.81            |
| Fukue #2      | 2.40            |
| Fukue #3      | 1.55            |
| Gwangju #1    | 2.20            |
| Gwangju #2    | 2.10            |
| Gwangju #3    | 2.02            |
| Hefei #1      | 1.74            |
| Hefei #2      | 2.01            |
| Zvenigorod #1 | 1.57            |

60

61 **Table S2.** Averages and  $1\sigma$  ranges of monthly mean AOD values derived from MAX-DOAS

62 observations and satellite observations.

|            | MAX-DOAS<br>(with cloud<br>screening) | MAX-DOAS<br>(without cloud<br>screening) | MODIS/Terra     | MODIS/Aqua      | MISR/Terra      |
|------------|---------------------------------------|------------------------------------------|-----------------|-----------------|-----------------|
| Cape Hedo  | $0.33 \pm 0.13$                       | $0.40 \pm 0.14$                          | $0.26 \pm 0.13$ | $0.25 \pm 0.14$ | $0.26 \pm 0.12$ |
| Yokosuka   | $0.24 \pm 0.05$                       | $0.30 \pm 0.06$                          | $0.37 \pm 0.16$ | $0.42 \pm 0.18$ | $0.27 \pm 0.17$ |
| Fukue      | $0.29 \pm 0.08$                       | $0.42 \pm 0.12$                          | $0.38 \pm 0.14$ | $0.34 \pm 0.12$ | $0.37 \pm 0.17$ |
| Gwangju    | $0.40 \pm 0.10$                       | $0.50 \pm 0.11$                          | $0.47 \pm 0.23$ | $0.53 \pm 0.23$ | $0.33 \pm 0.18$ |
| Hefei      | $0.59 \pm 0.13$                       | $0.73 \pm 0.15$                          | $0.80 \pm 0.28$ | $0.86 \pm 0.28$ | $0.60 \pm 0.23$ |
| Zvenigorod | $0.21 \pm 0.05$                       | $0.29 \pm 0.10$                          | $0.19 \pm 0.19$ | $0.21 \pm 0.22$ | $0.18 \pm 0.11$ |

63

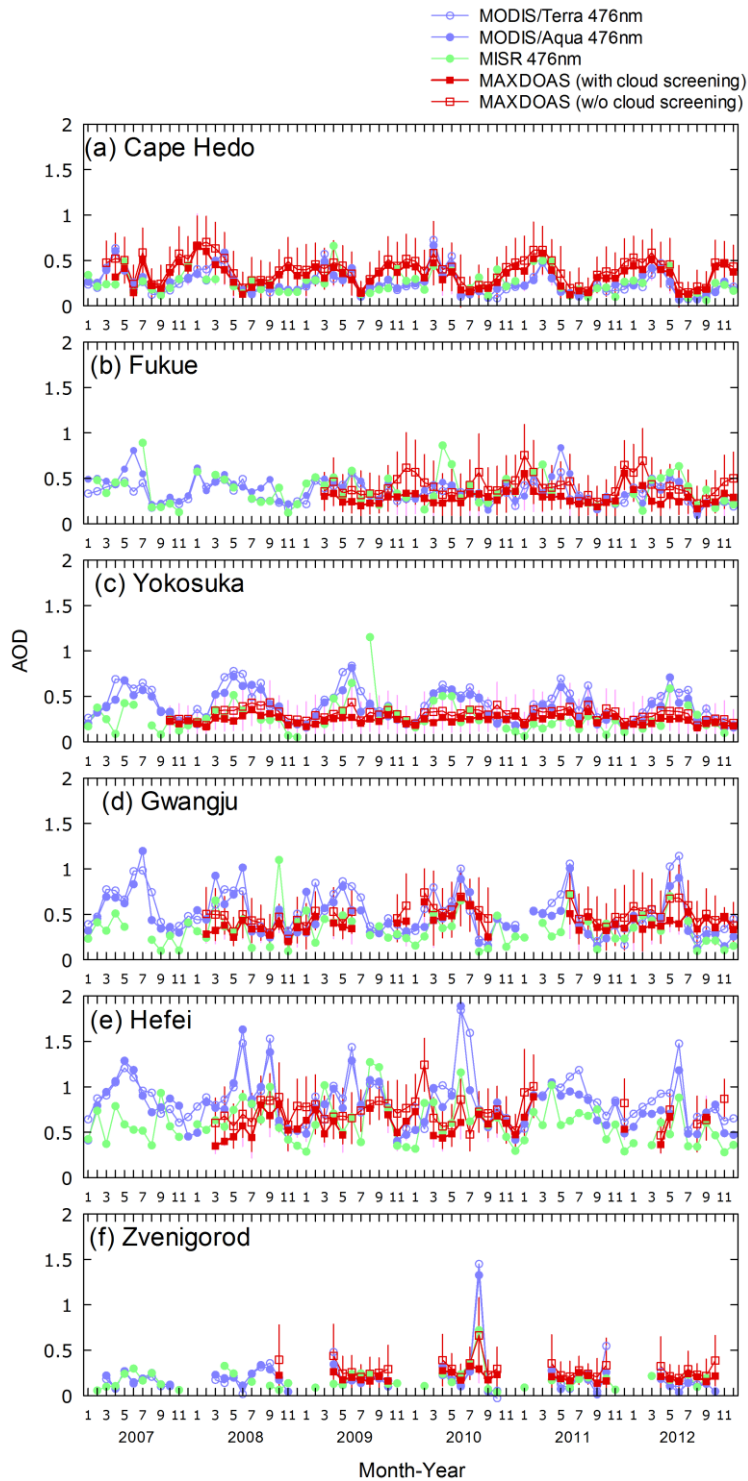

64

65 **Fig. S1.** Time series of monthly averages of AOD derived from MAX-DOAS and satellite  
 66 observations. The satellite observations are derived using MODIS and MISR sensors on board  
 67 Terra and Aqua. MAX-DOAS data, with and without cloud screening, are provided with error  
 68 bars representing the  $1\sigma$  range of the included data.

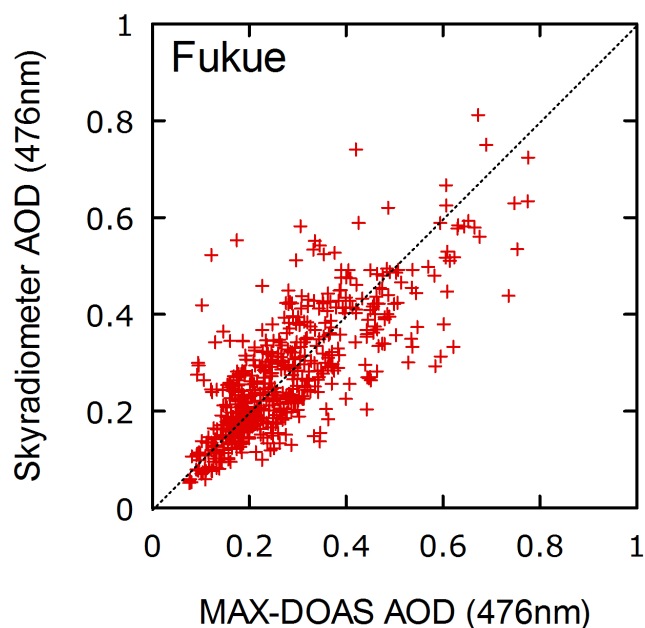

69  
 70 **Fig. S2.** Scatterplot between AODs observed by MAX-DOAS and a sky radiometer at Fukue  
 71 site in 2009.

72

73

74 **References**

75 Aoki, K, and Fujiyoshi, Y.: Sky radiometer measurements of aerosol optical properties over  
 76 Sapporo, Japan. *J. Meteorol Soc. Jpn.*, 81, 493-513, 2003.

77 Irie, H., Kanaya, Y., Akimoto, H., Iwabuchi, H., Shimizu, A., and Aoki, K.: First retrieval of  
 78 tropospheric aerosol profiles using MAX-DOAS and comparison with lidar and sky  
 79 radiometer measurements, *Atmos. Chem. Phys.*, 8, 341-350, 2008.

80 Takashima, H., Irie, H., Kanaya, Y., Shimizu, A., Aoki, K., and Akimoto, H.: Atmospheric  
 81 aerosol variations at Okinawa Island in Japan observed by MAX-DOAS using a new  
 82 cloud-screening method, *J. Geophys. Res.*, 114, D18213, doi:10.1029/2009JD011939,  
 83 2009.

84

85
